# Supplementary material
Source: Springer Nature journal article supplement (https://www.springermedizin.de/resource/supplementary/12879_2012_2123_MOESM1_ESM.pdf/9443550)
Supplement: MOESM1 [file 9443550]

16.597 HIV-infected patients in EuroSIDA  
as per January 2010

7.366 patients  
enrolled during  
2001 - 2008  
(cohorts 5-8)

**HCI 1, when to start cART**  
5,859 patients  
on cART at baseline (N=4,586)  
or start cART during follow-up (N=1,273)

**HCI 2, use of PCP chemoprophylaxis**  
7,097 patients  
with at least one follow-up visit after baseline

**HCI 3, frequency of laboratory monitoring**  
2,511 patients in the off cART group  
5,859 patients in the on cART group

**HCI 4, virological response**  
5,277 patients  
were on cART  $\geq 4$  continuous months  
and had HIV-RNA and CD4 count measured whilst on cART
